# Supplementary material for: Differences in age-related distribution of CSF alpha-synuclein seeding and Alzheimer profiles between PD with and without GBA1 variants
Source: Springer Nature journal article supplement (doi:10.1038/s41531-025-00978-1), 2025-05-05
Supplement: MOESM1 [file 41531_2025_978_MOESM1_ESM.pdf]

**Supplemental Table 1: GBA1 and APOε4 variant distribution among age and pathology groups**

| Age in years | GBA1 Genotype                                            | <b>α-Synuclein- AD-</b><br>PD <sub>wildtype</sub> n=12<br>PD <sub>GBA1</sub> n=12 |                               | <b>α-Synuclein+ AD-</b><br>PD <sub>wildtype</sub> n=166<br>PD <sub>GBA1</sub> n=115 |                                           | <b>α-Synuclein- AD+</b><br>PD <sub>wildtype</sub> n=2<br>PD <sub>GBA1</sub> n=2 |                          | <b>α-Synuclein+ AD+</b><br>PD <sub>wildtype</sub> n=8<br>PD <sub>GBA1</sub> n=0 |                          |
|--------------|----------------------------------------------------------|-----------------------------------------------------------------------------------|-------------------------------|-------------------------------------------------------------------------------------|-------------------------------------------|---------------------------------------------------------------------------------|--------------------------|---------------------------------------------------------------------------------|--------------------------|
|              |                                                          | No APOε4                                                                          | At least 1 APOε4              | No APOε4                                                                            | At least 1 APOε4                          | No APOε4                                                                        | At least 1 APOε4         | No APOε4                                                                        | At least 1 APOε4         |
| 40           | Wildtype: n=0<br>Risk: n=1<br>Mild: n=0<br>Severe: n=6   | 0 %<br>0 %<br>0 %<br>0 %                                                          | 0 %<br>0 %<br>0 %<br>0 %      | 0 %<br>100% n=1<br>0 %<br>100% n=6                                                  | 0 %<br>0 %<br>0 %<br>0 %                  | 0 %<br>0 %<br>0 %<br>0 %                                                        | 0 %<br>0 %<br>0 %<br>0 % | 0 %<br>0 %<br>0 %<br>0 %                                                        | 0 %<br>0 %<br>0 %<br>0 % |
| 45           | Wildtype: n=3<br>Risk: n=2<br>Mild: n=1<br>Severe: n=4   | 0 %<br>100% n=2<br>0 %<br>0 %                                                     | 0 %<br>0 %<br>0 %<br>0 %      | 66% n=2<br>0 %<br>100% n=1<br>75% n=3                                               | 33% n=1<br>0 %<br>0 %<br>25% n=1          | 0 %<br>0 %<br>0 %<br>0 %                                                        | 0 %<br>0 %<br>0 %<br>0 % | 0 %<br>0 %<br>0 %<br>0 %                                                        | 0 %<br>0 %<br>0 %<br>0 % |
| 50           | Wildtype: n=21<br>Risk: n=4<br>Mild: n=3<br>Severe: n=4  | 10% n=2<br>0 %<br>0 %<br>0 %                                                      | 0 %<br>0 %<br>33% n=1<br>0 %  | 76% n=16<br>50% n=2<br>0 %<br>100% n=4                                              | 14% n=3<br>50% n=2<br>66% n=2<br>0 %      | 0 %<br>0 %<br>0 %<br>0 %                                                        | 0 %<br>0 %<br>0 %<br>0 % | 0 %<br>0 %<br>0 %<br>0 %                                                        | 0 %<br>0 %<br>0 %<br>0 % |
| 55           | Wildtype: n=23<br>Risk: n=8<br>Mild: n=2<br>Severe: n=10 | 13% n=3<br>13% n=1<br>0 %<br>0 %                                                  | 0 %<br>0 %<br>100% n=2<br>0 % | 74% n=17<br>63% n=5<br>0 %<br>70% n=7                                               | 13% n=3<br>25% n=2<br>0 %<br>30% n=3      | 0 %<br>0 %<br>0 %<br>0 %                                                        | 0 %<br>0 %<br>0 %<br>0 % | 0 %<br>0 %<br>0 %<br>0 %                                                        | 0 %<br>0 %<br>0 %<br>0 % |
| 60           | Wildtype: n=34<br>Risk: n=14<br>Mild: n=7<br>Severe: n=6 | 6% n=2<br>0 %<br>0 %<br>0 %                                                       | 0 %<br>0 %<br>28% n=2<br>0 %  | 59% n=20<br>79% n=11<br>14% n=1<br>66% n=4                                          | 35% n=12<br>21% n=3<br>57% n=4<br>33% n=2 | 0 %<br>0 %<br>0 %<br>0 %                                                        | 0 %<br>0 %<br>0 %<br>0 % | 0 %<br>0 %<br>0 %<br>0 %                                                        | 0 %<br>0 %<br>0 %<br>0 % |
| 65           | Wildtype: n=39<br>Risk: n=15<br>Mild: n=4<br>Severe: n=5 | 5% n=2<br>6% n=1<br>0 %<br>0 %                                                    | 5% n=2<br>0 %<br>0 %<br>0 %   | 59% n=23<br>87% n=13<br>25% n=1<br>80% n=4                                          | 31% n=12<br>6% n=1<br>75% n=3<br>20% n=1  | 0 %<br>0 %<br>0 %<br>0 %                                                        | 0 %<br>0 %<br>0 %<br>0 % | 0 %<br>0 %<br>0 %<br>0 %                                                        | 0 %<br>0 %<br>0 %<br>0 % |
| 70           | Wildtype: n=39<br>Risk: n=13                             | 0 %<br>15% n=2                                                                    | 0 %<br>0 %                    | 82% n=32<br>69% n=9                                                                 | 15% n=6<br>15% n=2                        | 0 %<br>0 %                                                                      | 0 %<br>0 %               | 0 %<br>0 %                                                                      | 3% n=1<br>0 %            |

|    |                                                         |                              |                             |                                            |                                  |                              |                              |                             |                               |
|----|---------------------------------------------------------|------------------------------|-----------------------------|--------------------------------------------|----------------------------------|------------------------------|------------------------------|-----------------------------|-------------------------------|
|    | Mild: n=1<br>Severe: n=5                                | 0 %<br>0 %                   | 0 %<br>0 %                  | 100% n=1<br>80% n=4                        | 0 %<br>20% n=1                   | 0 %<br>0 %                   | 0 %<br>0 %                   | 0 %<br>0 %                  | 0 %<br>0 %                    |
| 75 | Wildtype: n=26<br>Risk: n=7<br>Mild: n=5<br>Severe: n=2 | 0 %<br>14% n=1<br>0 %<br>0 % | 4% n=1<br>0 %<br>0 %<br>0 % | 54% n=14<br>86% n=6<br>40% n=2<br>100% n=2 | 15% n=4<br>0 %<br>20% n=1<br>0 % | 0 %<br>0 %<br>40% n=2<br>0 % | 4% n=1<br>0 %<br>0 %<br>0 %  | 8% n=2<br>0 %<br>0 %<br>0 % | 15 % n=4<br>0 %<br>0 %<br>0 % |
| 80 | Wildtype: n=3<br>Risk: n=0<br>Mild: n=0<br>Severe: n=0  | 0 %<br>0%<br>0 %<br>0 %      | 0 %<br>0%<br>0 %<br>0 %     | 50% n=2<br>0 %<br>0 %<br>0 %               | 0 %<br>0 %<br>0 %<br>0 %         | 0 %<br>0 %<br>0 %<br>0 %     | 25% n=1<br>0 %<br>0 %<br>0 % | 0 %<br>0 %<br>0 %<br>0 %    | 25% n=1<br>0 %<br>0 %<br>0 %  |

Two samples with *GBA1* mild variant (age group 55 and age group 60) have no data on APOε4 genotype. Both samples show CSF α-Syn+AD- pathology

**Supplemental Table 2: Overview of each sample with information on demographics, genotype, CSF SAA, SAA kinetics and CSF AD profiles.**

| Sample | Sex | Agegroup [years] | Disease duration [years] | Hoehn &Yahr | UPDRS-III | SAA positivity out of 4 runs | AUC   | IMAX  | LAG   | CSF based pathology_1 | CSF based pathology_2 | GBA variants     | ApoE variants |
|--------|-----|------------------|--------------------------|-------------|-----------|------------------------------|-------|-------|-------|-----------------------|-----------------------|------------------|---------------|
| 1      | m   | 40               | 9,5                      | 2           | 28        | 3                            | 670   | 70,08 | 22,75 | AD-SAA+               | A-T-SAA+              | p.E365K          | E3/E3         |
| 2      | m   | 40               | 5,1                      | 1           | 19        | 3                            | 519,4 | 57,92 | 24,25 | AD-SAA+               | A-T-SAA+              | p.E365K, p.L483P | E2/E3         |
| 3      | m   | 40               | 7,1                      | 2           | 18        | 3                            | 649,8 | 57,06 | 20,5  | AD-SAA+               | A+T-SAA+              | p.E365K, p.L483P | E2/E3         |
| 4      | m   | 40               | 15,5                     | 2           | 39        | 4                            | 1069  | 71,84 | 15,94 | AD-SAA+               | A-T-SAA+              | p.L483P          | E3/E3         |
| 5      | m   | 40               | 16,7                     | 3           | 58        | 4                            | 1336  | 101,1 | 14,81 | AD-SAA+               | A-T-SAA+              | p.L483P          | E3/E3         |
| 6      | m   | 40               | 5,4                      | 2           | 28        | 4                            | 706   | 65,89 | 20,25 | AD-SAA+               | A-T+SAA+              | p.L483P          | E3/E3         |
| 7      | m   | 40               | 8                        | 2           | 22        | 4                            | 685,2 | 55,99 | 19,31 | AD-SAA+               | A-T+SAA+              | p.L483P          | E3/E3         |
| 8      | m   | 45               | 14,6                     | 2           | 18        | 0                            |       |       |       | AD-SAA-               | A-T-SAA-              | p.E365K          | E3/E3         |
| 9      | m   | 45               | 15,5                     | 2           | 10        | 0                            |       |       |       | AD-SAA-               | A-T-SAA-              | p.E365K          | E3/E3         |
| 10     | m   | 45               | 8,1                      | 2           | 19        | 4                            | 667,3 | 60,87 | 20,44 | AD-SAA+               | A-T-SAA+              | p.E365K, p.L483P | E2/E3         |
| 11     | m   | 45               | 9,7                      | 3           | 58        | 4                            | 558,3 | 53,45 | 22,88 | AD-SAA+               | A-T+SAA+              | p.L483P          | E3/E3         |
| 12     | m   | 45               | 1,3                      | 1           | 10        | 4                            | 863,2 | 68,03 | 17,81 | AD-SAA+               | A+T-SAA-              | p.L483P, p.T408M | E3/E4         |
| 13     | f   | 45               | 2,8                      | 2           | 16        | 2                            | 554,9 | 51,64 | 24    | AD-SAA+               | A-T-SAA+              | p.S310G          | E3/E3         |
| 14     | m   | 45               | 1,9                      | 2           | 30        | 3                            | 776,6 | 73,87 | 20,5  | AD-SAA+               | A-T-SAA+              | p.W223R          | E3/E3         |
| 15     | f   | 45               | 5,4                      | 2           | 19        | 3                            | 918,8 | 90    | 20,25 | AD-SAA+               | A-T-SAA+              | WT               | E3/E4         |
| 16     | m   | 45               | 1,3                      | 2           | 33        | 4                            | 796,2 | 67,1  | 19,88 | AD-SAA+               | A-T-SAA+              | WT               | E2/E3         |
| 17     | m   | 45               | 1,5                      | 2           | 30        | 2                            | 436,4 | 51    | 24,75 | AD-SAA+               | A-T-SAA+              | WT               | E3/E3         |
| 18     | m   | 50               | 15                       | 2           | 32        | 3                            | 333,1 | 46,64 | 27,25 | AD-SAA+               | A-T-SAA+              | p.D179H, p.E365K | E3/E4         |
| 19     | m   | 50               | 15,9                     | 2           | 27        | 4                            | 515,2 | 60,09 | 23,44 | AD-SAA+               | A+T-SAA-              | p.D179H, p.E365K | E3/E4         |
| 20     | m   | 50               | 14,3                     | 2           | 20        | 4                            | 905,4 | 49,04 | 12,75 | AD-SAA+               | A-T-SAA+              | p.E365K          | E3/E3         |
| 21     | m   | 50               | 9                        | 2           | 18        | 4                            | 624,7 | 59,54 | 20,81 | AD-SAA+               | A-T-SAA+              | p.E365K          | E3/E3         |
| 22     | m   | 50               | 2,7                      | 2           | 18        | 4                            | 1134  | 93,2  | 16,5  | AD-SAA+               | A+T-SAA-              | p.E365K          | E3/E4         |
| 23     | m   | 50               | 3,5                      | 2           | 16        | 4                            | 927,4 | 71,39 | 17,63 | AD-SAA+               | A+T-SAA-              | p.L483P          | E3/E3         |
| 24     | m   | 50               | 3,8                      | 2           | 31        | 4                            | 899,6 | 66,93 | 18    | AD-SAA+               | A-T-SAA+              | p.L483P          | E3/E3         |

|    |   |    |      |   |    |   |       |       |       |         |          |         |       |
|----|---|----|------|---|----|---|-------|-------|-------|---------|----------|---------|-------|
| 25 | m | 50 | 6,7  | 2 | 29 | 3 | 597,3 | 54,82 | 23,5  | AD-SAA+ | A-T-SAA+ | p.L483P | E3/E3 |
| 26 | f | 50 | 2,1  | 1 | 12 | 4 | 684,7 | 60,56 | 20,25 | AD-SAA+ | A-T-SAA+ | p.L483P | E3/E3 |
| 27 | m | 50 | 9,1  | 2 | 17 | 0 |       |       |       | AD-SAA- | A-T-SAA- | p.N409S | E3/E4 |
| 28 | f | 50 | 2,3  | 2 | 21 | 4 | 1172  | 79,44 | 16,31 | AD-SAA+ | A+T-SAA- | p.T408M | E3/E4 |
| 29 | m | 50 | 0,3  | 2 | 27 | 2 | 861,9 | 82,6  | 19,5  | AD-SAA+ | A-T-SAA+ | WT      | E3/E3 |
| 30 | f | 50 | 3,4  | 2 | 13 | 1 |       |       |       | AD-SAA- | A-T-SAA- | WT      | E3/E3 |
| 31 | f | 50 | 2,3  | 2 | 38 | 3 | 782,7 | 66,12 | 19,5  | AD-SAA+ | A+T-SAA+ | WT      | E3/E4 |
| 32 | m | 50 | 3,3  | 2 | 26 | 3 | 470,2 | 48,93 | 24,75 | AD-SAA+ | A-T-SAA+ | WT      | E3/E3 |
| 33 | m | 50 | 3,5  | 2 | 32 | 3 | 605,5 | 61,2  | 21,94 | AD-SAA+ | A-T-SAA+ | WT      | E2/E3 |
| 34 | f | 50 | 9,4  | 2 | 18 | 3 | 587,4 | 60,2  | 21,5  | AD-SAA+ | A-T+SAA+ | WT      | E3/E4 |
| 35 | m | 50 | 1,8  | 1 | 22 | 4 | 1027  | 79,7  | 17,8  | AD-SAA+ | A-T-SAA+ | WT      | E3/E3 |
| 36 | m | 50 | 3,8  | 2 | 25 | 4 | 597,6 | 65,4  | 22,31 | AD-SAA+ | A-T-SAA+ | WT      | E3/E3 |
| 37 | m | 50 | 2,8  | 2 | 21 | 2 | 682,2 | 67,7  | 21,38 | AD-SAA+ | A-T-SAA+ | WT      | E2/E3 |
| 38 | m | 50 | 5    | 2 | 25 | 2 | 586,1 | 78,3  | 23,25 | AD-SAA+ | A-T-SAA+ | WT      | E2/E3 |
| 39 | m | 50 | 6,3  | 2 | 43 | 1 |       |       |       | AD-SAA- | A-T-SAA- | WT      | E2/E3 |
| 40 | f | 50 | 1,8  | 2 | 40 | 4 | 446,2 | 59,4  | 24,75 | AD-SAA+ | A-T-SAA+ | WT      | E3/E3 |
| 41 | f | 50 | 2,9  | 1 | 24 | 4 | 778,8 | 80,1  | 20,25 | AD-SAA+ | A-T-SAA+ | WT      | E3/E3 |
| 42 | m | 50 | 4,5  | 2 | 18 | 2 | 596   | 64,7  | 22,88 | AD-SAA+ | A+T-SAA+ | WT      | E3/E3 |
| 43 | m | 50 | 2,1  | 2 | 14 | 4 | 661,3 | 72,5  | 22,69 | AD-SAA+ | A+T-SAA- | WT      | E3/E4 |
| 44 | f | 50 | 5,8  | 2 | 24 | 3 | 905,2 | 79,5  | 18,75 | AD-SAA+ | A-T-SAA+ | WT      | E2/E3 |
| 45 | m | 50 | 3,1  | 2 | 27 | 2 | 658,7 | 74,3  | 21,38 | AD-SAA+ | A-T-SAA+ | WT      | E3/E3 |
| 46 | m | 50 | 1,8  | 2 | 14 | 3 | 871,2 | 78,7  | 18,75 | AD-SAA+ | A+T-SAA+ | WT      | E3/E3 |
| 47 | m | 50 | 4,3  | 2 | 19 | 4 | 940,8 | 73,2  | 17,25 | AD-SAA+ | A-T-SAA+ | WT      | E3/E3 |
| 48 | f | 50 | 1,4  | 1 | 14 | 3 | 429,6 | 57,2  | 25,25 | AD-SAA+ | A-T-SAA+ | WT      | E3/E3 |
| 49 | f | 50 | 3,7  | 2 | 27 | 3 | 480,1 | 44,1  | 23,75 | AD-SAA+ | A-T+SAA+ | WT      | E3/E3 |
| 50 | m | 55 | 19,5 | 2 | 35 | 4 | 787,9 | 71,1  | 19,13 | AD-SAA+ | A-T-SAA+ | p.D448H | E3/E4 |
| 51 | m | 55 | 7,2  | 2 | 22 | 4 | 604,7 | 65,54 | 21,94 | AD-SAA+ | A+T-SAA- | p.E365K | E3/E3 |
| 52 | m | 55 | 8,2  | 2 | 33 | 4 | 868,9 | 79,03 | 19,13 | AD-SAA+ | A-T-SAA+ | p.E365K | E3/E3 |
| 53 | m | 55 | 3,7  | 2 | 29 | 4 | 889,7 | 67,3  | 17,63 | AD-SAA+ | A+T-SAA- | p.E365K | E4/E4 |
| 54 | m | 55 | 4,5  | 2 | 18 | 4 | 791,3 | 66,43 | 19,13 | AD-SAA+ | A+T-SAA- | p.E365K | E3/E3 |
| 55 | m | 55 | 6,7  | 2 | 12 | 4 | 716,1 | 67,72 | 20,25 | AD-SAA+ | A-T-SAA+ | p.E365K | E3/E3 |
| 56 | m | 55 | 6,6  | 2 | 48 | 4 | 1046  | 66,75 | 15    | AD-SAA+ | A-T-SAA+ | p.L483P | E3/E3 |

|    |   |    |      |     |    |   |       |       |       |         |          |         |       |
|----|---|----|------|-----|----|---|-------|-------|-------|---------|----------|---------|-------|
| 57 | f | 55 | 5,7  | 2   | 26 | 4 | 784,4 | 64,01 | 18,56 | AD-SAA+ | A-T-SAA+ | p.L483P | E3/E3 |
| 58 | m | 55 | 7,6  | 2   | 32 | 4 | 1132  | 95,61 | 16,88 | AD-SAA+ | A+T-SAA- | p.L483P | E3/E3 |
| 59 | m | 55 | 8,3  | 2   | 33 | 4 | 1060  | 90,19 | 17,63 | AD-SAA+ | A+T-SAA- | p.L483P | E3/E3 |
| 60 | m | 55 | 11,5 | 3   | 37 | 4 | 880,1 | 70,89 | 18,19 | AD-SAA+ | A-T-SAA+ | p.L483P | E3/E3 |
| 61 | m | 55 | 7,4  | 2   | 42 | 3 | 793,2 | 61,38 | 18,5  | AD-SAA+ | A-T-SAA+ | p.L483P | E3/E4 |
| 62 | m | 55 | 8,6  | 2   | 53 | 4 | 694   | 67,45 | 20,63 | AD-SAA+ | A+T-SAA- | p.L483P | E3/E4 |
| 63 | m | 55 | 3,3  | 2   | 53 | 0 |       |       |       | AD-SAA- | A-T-SAA- | p.N409S | E3/E4 |
| 64 | f | 55 | 7    | 2,5 | 32 | 4 | 624,6 | 56,9  | 21    | AD-SAA+ | A-T-SAA+ | p.N409S | -     |
| 65 | m | 55 | 1,8  | 2   | 13 | 0 |       |       |       | AD-SAA- | A+T-SAA- | p.N409S | E3/E4 |
| 66 | m | 55 | 1,3  | 2   | 30 | 0 |       |       |       | AD-SAA- | A-T-SAA- | p.T336S | E3/E3 |
| 67 | m | 55 | 4,6  | 2,5 | 33 | 3 | 464,8 | 56,57 | 24    | AD-SAA+ | A-T-SAA+ | p.T408M | E3/E4 |
| 68 | f | 55 | 18   | 2,5 | 49 | 4 | 1018  | 85,1  | 17,63 | AD-SAA+ | A+T-SAA- | p.T408M | E3/E3 |
| 69 | m | 55 | 6,3  | 2   | 19 | 4 | 775,1 | 67,29 | 18,94 | AD-SAA+ | A-T-SAA+ | p.W223R | E3/E3 |
| 70 | m | 55 | 8,1  | 2   | 30 | 3 | 506,8 | 58,27 | 23,5  | AD-SAA+ | A-T-SAA+ | p.W223R | E3/E3 |
| 71 | m | 55 | 3    | 2   | 20 | 2 | 627,1 | 61,8  | 21,38 | AD-SAA+ | A+T-SAA+ | WT      | E3/E3 |
| 72 | m | 55 | 3,4  | 2   | 20 | 3 | 845,7 | 86,1  | 19,8  | AD-SAA+ | A+T-SAA+ | WT      | E2/E4 |
| 73 | m | 55 | 5,8  | 2   | 32 | 3 | 301,8 | 43    | 27,5  | AD-SAA+ | A-T-SAA+ | WT      | E2/E4 |
| 74 | f | 55 | 2,8  | 2   | 19 | 0 |       |       |       | AD-SAA- | A-T-SAA- | WT      | E3/E3 |
| 75 | f | 55 | 6,7  | 1   | 16 | 0 |       |       |       | AD-SAA- | A-T-SAA- | WT      | E3/E3 |
| 76 | m | 55 | 8    | 2   | 24 | 4 | 1015  | 78,1  | 16,88 | AD-SAA+ | A-T-SAA+ | WT      | E2/E3 |
| 77 | m | 55 | 5,8  | 2   | 28 | 4 | 985,3 | 78,7  | 17,44 | AD-SAA+ | A-T-SAA+ | WT      | E3/E3 |
| 78 | m | 55 | 7,8  | 2   | 32 | 4 | 659,8 | 68,2  | 21,75 | AD-SAA+ | A-T-SAA+ | WT      | E3/E3 |
| 79 | m | 55 | 8,8  | 2   | 27 | 4 | 967,2 | 76,1  | 17,44 | AD-SAA+ | A+T-SAA- | WT      | E3/E3 |
| 80 | m | 55 | 8,4  | 2   | 29 | 3 | 427,6 | 53,6  | 25,13 | AD-SAA+ | A-T-SAA+ | WT      | E2/E3 |
| 81 | m | 55 | 1,9  | 2   | 23 | 4 | 638,5 | 59,4  | 23,4  | AD-SAA+ | A-T-SAA+ | WT      | E3/E4 |
| 82 | f | 55 | 3,8  | 2   | 27 | 3 | 658,4 | 64,3  | 22,69 | AD-SAA+ | A-T-SAA+ | WT      | E3/E3 |
| 83 | f | 55 | 5,6  | 2   | 29 | 2 | 802,2 | 68,5  | 19,5  | AD-SAA+ | A-T-SAA+ | WT      | E3/E3 |
| 84 | f | 55 | 3,7  | 2   | 16 | 0 |       |       |       | AD-SAA- | A-T-SAA- | WT      | E3/E3 |
| 85 | f | 55 | 5,6  | 2   | 16 | 3 | 882,5 | 70,7  | 18    | AD-SAA+ | A-T-SAA+ | WT      | E3/E3 |
| 86 | f | 55 | 5,6  | 3   | 44 | 3 | 526,9 | 63,3  | 23,75 | AD-SAA+ | A-T-SAA+ | WT      | E3/E4 |
| 87 | m | 55 | 7,6  | 2   | 31 | 3 | 1320  | 97,2  | 15,25 | AD-SAA+ | A+T-SAA+ | WT      | E3/E3 |
| 88 | m | 55 | 4,8  | 2   | 25 | 4 | 317   | 43,8  | 27    | AD-SAA+ | A+T-SAA- | WT      | E3/E3 |

|     |   |    |      |   |    |   |       |       |       |         |          |                                        |       |
|-----|---|----|------|---|----|---|-------|-------|-------|---------|----------|----------------------------------------|-------|
| 89  | m | 55 | 7,7  | 3 | 16 | 3 | 709,4 | 75,8  | 19,5  | AD-SAA+ | A-T-SAA+ | WT                                     | E3/E3 |
| 90  | f | 55 | 1,7  | 1 | 11 | 3 | 688,1 | 57,9  | 20,75 | AD-SAA+ | A-T-SAA+ | WT                                     | E2/E3 |
| 91  | m | 55 | 6,6  | 2 | 39 | 4 | 856,5 | 73,6  | 18,94 | AD-SAA+ | A-T-SAA+ | WT                                     | E3/E3 |
| 92  | m | 55 | 8,9  | 2 | 41 | 4 | 719,6 | 77,7  | 22,31 | AD-SAA+ | A-T-SAA+ | WT                                     | E3/E3 |
| 93  | f | 55 | 1,2  | 1 | 8  | 3 | 350,3 | 48,8  | 26,25 | AD-SAA+ | A+T-SAA+ | WT                                     | E3/E4 |
| 94  | m | 60 | 7,8  | 3 | 10 | 4 | 1211  | 90,68 | 15,75 | AD-SAA+ | A-T-SAA+ | c.1265_1319del,<br>p.D448H,<br>p.L483P | E3/E4 |
| 95  | m | 60 | 9,8  | 2 | 43 | 4 | 1179  | 89,27 | 15,94 | AD-SAA+ | A-T-SAA+ | p.E365K                                | E2/E3 |
| 96  | m | 60 | 11,8 | 3 | 36 | 4 | 912,9 | 85,67 | 21,56 | AD-SAA+ | A+T-SAA- | p.E365K                                | E2/E3 |
| 97  | m | 60 | 6,8  | 2 | 32 | 4 | 1020  | 78,86 | 17,06 | AD-SAA+ | A+T-SAA- | p.E365K                                | E3/E3 |
| 98  | m | 60 | 6,7  | 2 | 26 | 4 | 721,9 | 68,53 | 21,56 | AD-SAA+ | A-T+SAA+ | p.E365K                                | E3/E3 |
| 99  | m | 60 | 5,8  | 1 | 16 | 4 | 1005  | 89,61 | 17,63 | AD-SAA+ | A+T-SAA- | p.E365K                                | E3/E4 |
| 100 | m | 60 | 10,2 | 2 | 25 | 4 | 1152  | 88,97 | 17,06 | AD-SAA+ | A-T-SAA+ | p.E365K                                | E3/E3 |
| 101 | f | 60 | 12,6 | 2 | 24 | 3 | 480,3 | 55,79 | 24,25 | AD-SAA+ | A+T-SAA+ | p.E365K                                | E3/E3 |
| 102 | f | 60 | 13,5 | 2 | 37 | 3 | 1120  | 88,29 | 17    | AD-SAA+ | A-T-SAA+ | p.E365K                                | E3/E3 |
| 103 | m | 60 | 2,7  | 2 | 16 | 3 | 1088  | 89,97 | 17,25 | AD-SAA+ | A+T-SAA+ | p.E365K                                | E3/E4 |
| 104 | f | 60 | 6,2  | 2 | 17 | 4 | 845,5 | 63,32 | 18    | AD-SAA+ | A-T+SAA+ | p.E365K                                | E2/E3 |
| 105 | f | 60 | 8,2  | 2 | 10 | 2 | 666   | 55,16 | 22,88 | AD-SAA+ | A-T+SAA+ | p.E365K                                | E2/E3 |
| 106 | f | 60 | 10,2 | 2 | 18 | 4 | 940   | 70,52 | 17,44 | AD-SAA+ | A-T+SAA+ | p.E365K                                | E2/E3 |
| 107 | m | 60 | 6,3  | 2 | 28 | 4 | 1102  | 90,63 | 17,63 | AD-SAA+ | A-T-SAA+ | p.L483P                                | E3/E3 |
| 108 | m | 60 | 12,8 | 3 | 45 | 4 | 702,6 | 64,24 | 20,63 | AD-SAA+ | A+T-SAA- | p.L483P                                | E3/E3 |
| 109 | m | 60 | 12,7 | 2 | 57 | 4 | 1184  | 102,7 | 17,25 | AD-SAA+ | A+T-SAA- | p.L483P                                | E3/E4 |
| 110 | f | 60 | 10,2 | 2 | 43 | 4 | 772,7 | 62,75 | 19,31 | AD-SAA+ | A-T-SAA+ | p.L483P                                | E3/E3 |
| 111 | f | 60 | 7,6  | 2 | 26 | 3 | 784,9 | 78,6  | 20,25 | AD-SAA+ | A-T-SAA+ | p.N409S                                | E3/E4 |
| 112 | f | 60 | 11,8 | 3 | 39 | 3 | 446,3 | 43,64 | 24,25 | AD-SAA+ | A-T-SAA+ | p.N409S                                | E3/E4 |
| 113 | m | 60 | 15   | 2 | 21 | 4 | 652   | 63,64 | 21,38 | AD-SAA+ | A-T-SAA+ | p.N409S                                | E3/E4 |
| 114 | m | 60 | 19,2 | 2 | 38 | 4 | 612,7 | 59,97 | 21,94 | AD-SAA+ | A-T-SAA+ | p.N409S                                | E3/E4 |
| 115 | f | 60 | 10,3 | 2 | 25 | 4 | 1166  | 75,4  | 14,63 | AD-SAA+ | A-T-SAA+ | p.N409S                                | -     |
| 116 | m | 60 | 3,7  | 2 | 12 | 0 |       |       |       | AD-SAA- | A-T-SAA- | p.N409S                                | E3/E4 |
| 117 | m | 60 | 5,7  | 2 | 30 | 0 |       |       |       | AD-SAA- | A-T-SAA- | p.N409S                                | E3/E4 |
| 118 | m | 60 | 11,6 | 3 | 26 | 3 | 969,2 | 82,79 | 18,5  | AD-SAA+ | A-T-SAA+ | p.R398*                                | E3/E3 |

|     |   |    |      |     |    |   |       |       |       |         |          |                     |       |
|-----|---|----|------|-----|----|---|-------|-------|-------|---------|----------|---------------------|-------|
| 119 | m | 60 | 5,3  | 2   | 39 | 3 | 906,3 | 76,14 | 18    | AD-SAA+ | A+T-SAA+ | p.S310G,<br>p.N409S | E3/E3 |
| 120 | f | 60 | 6,7  | 3   | 35 | 4 | 758,8 | 66,49 | 20,63 | AD-SAA+ | A+T-SAA- | p.T408M             | E3/E3 |
| 121 | m | 60 | 6,1  | 2   | 30 | 3 | 614,3 | 74,09 | 22,5  | AD-SAA+ | A-T-SAA+ | p.T408M             | E3/E4 |
| 122 | m | 60 | 2,5  | 2,5 | 14 | 2 | 1013  | 78,5  | 17,25 | AD-SAA+ | A-T-SAA+ | WT                  | E3/E3 |
| 123 | m | 60 | 4,8  | 2   | 18 | 3 | 828,6 | 79,4  | 19,69 | AD-SAA+ | A+T-SAA+ | WT                  | E3/E3 |
| 124 | m | 60 | 2,8  | 2   | 31 | 4 | 710,1 | 63,4  | 19,88 | AD-SAA+ | A+T-SAA- | WT                  | E3/E3 |
| 125 | m | 60 | 6,7  | 2   | 14 | 2 | 687   | 58,8  | 19,5  | AD-SAA+ | A-T-SAA+ | WT                  | E3/E3 |
| 126 | m | 60 | 7,5  | 2   | 31 | 4 | 764,6 | 60,8  | 18,6  | AD-SAA+ | A+T-SAA- | WT                  | E3/E3 |
| 127 | m | 60 | 5    | 2   | 33 | 4 | 805,2 | 72    | 19,69 | AD-SAA+ | A-T-SAA+ | WT                  | E3/E3 |
| 128 | f | 60 | 7,7  | 3   | 44 | 4 | 673,6 | 71,9  | 22,5  | AD-SAA+ | A+T-SAA- | WT                  | E3/E3 |
| 129 | m | 60 | 6,7  | 2   | 17 | 4 | 813,6 | 74,1  | 19,13 | AD-SAA+ | A+T-SAA- | WT                  | E3/E4 |
| 130 | m | 60 | 6,8  | 2   | 31 | 3 | 573,2 | 54    | 21,75 | AD-SAA+ | A-T-SAA+ | WT                  | E3/E3 |
| 131 | m | 60 | 6,8  | 2   | 11 | 4 | 1247  | 102   | 16,7  | AD-SAA+ | A-T-SAA+ | WT                  | E4/E4 |
| 132 | m | 60 | 13   | 2   | 27 | 3 | 544,8 | 55,62 | 23,5  | AD-SAA+ | A-T-SAA+ | WT                  | E3/E3 |
| 133 | f | 60 | 6,8  | 2   | 17 | 0 |       |       |       | AD-SAA- | A+T-SAA- | WT                  | E3/E3 |
| 134 | m | 60 | 4,6  | 1   | 9  | 4 | 560,9 | 60,1  | 22,88 | AD-SAA+ | A+T-SAA- | WT                  | E3/E4 |
| 135 | m | 60 | 13,4 | 2   | 16 | 2 | 191   | 34,43 | 30    | AD-SAA+ | A-T-SAA+ | WT                  | E3/E4 |
| 136 | f | 60 | 12,1 | 2   | 10 | 0 |       |       |       | AD-SAA- | A-T-SAA- | WT                  | E3/E3 |
| 137 | m | 60 | 9    | 2   | 38 | 3 | 684,8 | 62,6  | 22,5  | AD-SAA+ | A-T-SAA+ | WT                  | E2/E3 |
| 138 | m | 60 | 3,9  | 2   | 35 | 3 | 618,4 | 62,6  | 21,5  | AD-SAA+ | A-T-SAA+ | WT                  | E3/E4 |
| 139 | m | 60 | 5,8  | 2   | 41 | 4 | 387,2 | 51,9  | 25,88 | AD-SAA+ | A-T-SAA+ | WT                  | E3/E4 |
| 140 | m | 60 | 7,8  | 2   | 28 | 3 | 414,3 | 48,1  | 25,5  | AD-SAA+ | A-T-SAA+ | WT                  | E3/E4 |
| 141 | m | 60 | 2,8  | 2   | 27 | 3 | 359,3 | 48,6  | 26,75 | AD-SAA+ | A-T-SAA+ | WT                  | E3/E4 |
| 142 | m | 60 | 4,9  | 2   | 36 | 4 | 767,2 | 70,5  | 20,63 | AD-SAA+ | A-T-SAA+ | WT                  | E3/E4 |
| 143 | f | 60 | 7,8  | 2,5 | 28 | 3 | 811,8 | 75,1  | 19,88 | AD-SAA+ | A-T-SAA+ | WT                  | E3/E3 |
| 144 | f | 60 | 8,8  | 3   | 38 | 2 | 971,8 | 76,2  | 17,25 | AD-SAA+ | A-T-SAA+ | WT                  | E3/E3 |
| 145 | m | 60 | 5,5  | 2   | 24 | 3 | 741   | 69,7  | 20,06 | AD-SAA+ | A-T-SAA+ | WT                  | E3/E3 |
| 146 | f | 60 | 7,5  | 2   | 19 | 3 | 888,9 | 70,5  | 19,5  | AD-SAA+ | A-T-SAA+ | WT                  | E3/E4 |
| 147 | f | 60 | 9,6  | 3   | 36 | 4 | 784,7 | 64    | 18,56 | AD-SAA+ | A+T-SAA- | WT                  | E3/E4 |
| 148 | m | 60 | 6,8  | 2   | 24 | 4 | 693,7 | 60,3  | 20,63 | AD-SAA+ | A+T-SAA- | WT                  | E3/E3 |
| 149 | m | 60 | 6,6  | 2   | 19 | 4 | 1069  | 95,1  | 17,63 | AD-SAA+ | A+T-SAA- | WT                  | E2/E3 |

|     |   |    |      |     |    |   |       |       |       |         |          |                  |       |
|-----|---|----|------|-----|----|---|-------|-------|-------|---------|----------|------------------|-------|
| 150 | m | 60 | 6    | 2   | 24 | 3 | 228,6 | 42,1  | 29    | AD-SAA+ | A-T-SAA+ | WT               | E3/E3 |
| 151 | f | 60 | 1,9  | 2   | 17 | 3 | 545,3 | 53,7  | 21,75 | AD-SAA+ | A-T-SAA+ | WT               | E3/E3 |
| 152 | m | 60 | 1,3  | 2   | 28 | 3 | 479,8 | 50,1  | 23,75 | AD-SAA+ | A-T-SAA+ | WT               | E3/E3 |
| 153 | m | 60 | 4,3  | 2   | 32 | 4 | 578,1 | 60,8  | 23,06 | AD-SAA+ | A-T-SAA+ | WT               | E3/E3 |
| 154 | m | 60 | 4,7  | 2   | 5  | 4 | 679,8 | 68,1  | 20,81 | AD-SAA+ | A+T-SAA- | WT               | E3/E4 |
| 155 | m | 60 | 4,3  | 2,5 | 19 | 2 | 743,3 | 63,6  | 19,88 | AD-SAA+ | A-T-SAA+ | WT               | E3/E3 |
| 156 | f | 65 | 7,3  | 2   | 8  | 4 | 941,5 | 76,88 | 19,5  | AD-SAA+ | A+T-SAA- | c.115+1G>A       | E3/E4 |
| 157 | m | 65 | 12,1 | 2   | 31 | 3 | 1502  | 96,34 | 13,5  | AD-SAA+ | A-T-SAA+ | p.E365K          | E3/E3 |
| 158 | m | 65 | 4,3  | 2   | 31 | 3 | 480,5 | 55,91 | 24,38 | AD-SAA+ | A-T-SAA+ | p.E365K          | E3/E3 |
| 159 | f | 65 | 4,1  | 1   | 7  | 4 | 646,9 | 63,57 | 21,94 | AD-SAA+ | A-T-SAA+ | p.E365K          | E2/E3 |
| 160 | m | 65 | 10,8 | 2   | 22 | 4 | 440   | 52,83 | 24,19 | AD-SAA+ | A-T-SAA+ | p.E365K          | E2/E3 |
| 161 | m | 65 | 7,8  | 2,5 | 32 | 4 | 856,2 | 81,49 | 19,88 | AD-SAA+ | A-T+SAA+ | p.E365K          | E3/E3 |
| 162 | m | 65 | 9,9  | 3   | 46 | 4 | 1122  | 96,19 | 17,81 | AD-SAA+ | A-T+SAA+ | p.E365K          | E3/E3 |
| 163 | f | 65 | 1,8  | 1   | 30 | 4 | 1247  | 94,59 | 16,13 | AD-SAA+ | A-T-SAA+ | p.E365K          | E3/E4 |
| 164 | m | 65 | 10,3 | 2   | 28 | 4 | 758,6 | 61,15 | 18,75 | AD-SAA+ | A+T-SAA- | p.E365K          | E3/E3 |
| 165 | m | 65 | 6,1  | 3   | 24 | 4 | 1258  | 102,1 | 16,13 | AD-SAA+ | A+T-SAA- | p.E365K          | E2/E3 |
| 166 | m | 65 | 0,8  | 1   | 14 | 0 |       |       |       | AD-SAA- | A+T-SAA- | p.E365K          | E3/E3 |
| 167 | f | 65 | 7,9  | 2   | 30 | 4 | 1137  | 76,24 | 15,38 | AD-SAA+ | A+T-SAA- | p.E365K, p.L483P | E3/E3 |
| 168 | m | 65 | 9,3  | 3   | 47 | 4 | 1081  | 66,54 | 14,25 | AD-SAA+ | A-T-SAA+ | p.L483P          | E3/E3 |
| 169 | m | 65 | 6,3  | 2   | 15 | 4 | 682,6 | 68,95 | 21,38 | AD-SAA+ | A-T-SAA+ | p.L483P          | E3/E3 |
| 170 | m | 65 | 7,2  | 2   | 35 | 4 | 894,5 | 74,29 | 18,38 | AD-SAA+ | A+T-SAA- | p.L483P          | E3/E3 |
| 171 | f | 65 | 12,8 | 3   | 70 | 4 | 552   | 50,45 | 21,75 | AD-SAA+ | A-T-SAA+ | p.N409S          | E3/E4 |
| 172 | m | 65 | 8,7  | 3   | 43 | 4 | 803,2 | 74,62 | 20,06 | AD-SAA+ | A+T-SAA- | p.N409S          | E3/E4 |
| 173 | m | 65 | 20,9 | 2   | 12 | 4 | 482,9 | 54,22 | 24,38 | AD-SAA+ | A+T-SAA- | p.N409S          | E3/E4 |
| 174 | m | 65 | 5,8  | 2   | 26 | 4 | 908,5 | 83,13 | 18,75 | AD-SAA+ | A-T-SAA+ | p.N409S          | E3/E3 |
| 175 | f | 65 | 4,3  | 2   | 13 | 4 | 1079  | 86,3  | 17,25 | AD-SAA+ | A-T-SAA+ | p.R78C           | E3/E3 |
| 176 | m | 65 | 3,3  | 2   | 17 | 4 | 532,8 | 56,09 | 23,25 | AD-SAA+ | A-T-SAA+ | p.T408M          | E3/E3 |
| 177 | f | 65 | 2,8  | 3   | 24 | 3 | 761   | 76,62 | 22,25 | AD-SAA+ | A+T-SAA+ | p.T408M          | E3/E3 |
| 178 | f | 65 | 4,7  | 3   | 20 | 3 | 646,1 | 62,7  | 21    | AD-SAA+ | A-T-SAA+ | p.T408M          | E3/E3 |
| 179 | m | 65 | 8,5  | 2   | 37 | 4 | 506,9 | 64,39 | 23,81 | AD-SAA+ | A-T-SAA+ | p.T408M          | E3/E3 |
| 180 | f | 65 | 5,4  | 2   | 41 | 4 | 429,2 | 52,8  | 25,75 | AD-SAA+ | A+T-SAA- | WT               | E3/E4 |
| 181 | m | 65 | 5,3  | 2   | 20 | 4 | 654,5 | 60,2  | 20,63 | AD-SAA+ | A-T-SAA+ | WT               | E3/E3 |

|     |   |    |      |   |    |   |       |       |       |         |          |    |       |
|-----|---|----|------|---|----|---|-------|-------|-------|---------|----------|----|-------|
| 182 | m | 65 | 9,9  | 2 | 38 | 3 | 652,4 | 75,6  | 21,75 | AD-SAA+ | A+T-SAA+ | WT | E3/E3 |
| 183 | m | 65 | 8,4  | 2 | 26 | 4 | 1281  | 89,5  | 15,19 | AD-SAA+ | A+T-SAA- | WT | E3/E3 |
| 184 | m | 65 | 5,8  | 2 | 32 | 4 | 564,1 | 59,2  | 22,13 | AD-SAA+ | A-T-SAA+ | WT | E3/E3 |
| 185 | m | 65 | 10,5 | 2 | 29 | 4 | 1365  | 102   | 15,56 | AD-SAA+ | A+T-SAA- | WT | E4/E4 |
| 186 | m | 65 | 12,7 | 2 | 20 | 4 | 652,2 | 60,6  | 20,44 | AD-SAA+ | A+T-SAA- | WT | E4/E4 |
| 187 | m | 65 | 13,6 | 2 | 26 | 4 | 598,1 | 57,4  | 21,75 | AD-SAA+ | A+T-SAA- | WT | E4/E4 |
| 188 | m | 65 | 5,6  | 2 | 7  | 4 | 845,1 | 68    | 19,1  | AD-SAA+ | A-T-SAA+ | WT | E3/E3 |
| 189 | m | 65 | 3,7  | 2 | 23 | 2 | 557,9 | 68,81 | 23,25 | AD-SAA+ | A-T-SAA+ | WT | E3/E3 |
| 190 | m | 65 | 5,7  | 2 | 20 | 3 | 442,9 | 64,83 | 24,5  | AD-SAA+ | A-T-SAA+ | WT | E3/E3 |
| 191 | m | 65 | 9,2  | 2 | 23 | 4 | 682,6 | 62    | 21    | AD-SAA+ | A-T-SAA+ | WT | E3/E3 |
| 192 | m | 65 | 12,2 | 2 | 26 | 4 | 754,6 | 75,4  | 20,44 | AD-SAA+ | A-T-SAA+ | WT | E3/E3 |
| 193 | m | 65 | 13,1 | 2 | 27 | 4 | 949,6 | 79,8  | 18,19 | AD-SAA+ | A-T-SAA+ | WT | E3/E3 |
| 194 | m | 65 | 1,9  | 2 | 23 | 4 | 580,1 | 58,5  | 23,4  | AD-SAA+ | A-T-SAA+ | WT | E3/E3 |
| 195 | m | 65 | 3,9  | 1 | 16 | 4 | 808,3 | 70    | 19,69 | AD-SAA+ | A-T-SAA+ | WT | E3/E3 |
| 196 | f | 65 | 12,3 | 1 | 3  | 0 |       |       |       | AD-SAA- | A+T-SAA- | WT | E3/E3 |
| 197 | m | 65 | 3,9  | 2 | 21 | 3 | 890,9 | 85    | 19    | AD-SAA+ | A+T-SAA+ | WT | E3/E3 |
| 198 | m | 65 | 7    | 2 | 24 | 4 | 1013  | 78,6  | 18,56 | AD-SAA+ | A+T-SAA- | WT | E3/E4 |
| 199 | m | 65 | 3,3  | 2 | 23 | 4 | 526,7 | 51,2  | 22,88 | AD-SAA+ | A-T-SAA+ | WT | E3/E3 |
| 200 | m | 65 | 6,8  | 2 | 25 | 4 | 418,4 | 46,3  | 25,13 | AD-SAA+ | A-T-SAA+ | WT | E3/E4 |
| 201 | m | 65 | 7,8  | 2 | 29 | 4 | 503,4 | 58,3  | 23,63 | AD-SAA+ | A+T-SAA- | WT | E3/E4 |
| 202 | m | 65 | 9,5  | 2 | 30 | 4 | 458,2 | 55,9  | 25,13 | AD-SAA+ | A-T+SAA+ | WT | E3/E3 |
| 203 | m | 65 | 11,5 | 2 | 25 | 3 | 807,4 | 67,3  | 18,25 | AD-SAA+ | A-T+SAA+ | WT | E3/E3 |
| 204 | f | 65 | 5,4  | 2 | 10 | 0 |       |       |       | AD-SAA- | A-T+SAA- | WT | E2/E3 |
| 205 | m | 65 | 18,5 | 5 | 42 | 4 | 1004  | 77,7  | 18    | AD-SAA+ | A+T-SAA- | WT | E3/E4 |
| 206 | m | 65 | 4,9  | 2 | 37 | 4 | 704,8 | 66,8  | 20,63 | AD-SAA+ | A-T-SAA+ | WT | E2/E3 |
| 207 | m | 65 | 2,3  | 1 | 25 | 2 | 511,5 | 43,1  | 22,5  | AD-SAA+ | A-T-SAA+ | WT | E3/E3 |
| 208 | f | 65 | 1,9  | 1 | 5  | 4 | 960,8 | 89,3  | 20,44 | AD-SAA+ | A+T-SAA- | WT | E3/E3 |
| 209 | f | 65 | 2,2  | 1 | 9  | 3 | 462,6 | 62,1  | 24,75 | AD-SAA+ | A+T-SAA+ | WT | E3/E3 |
| 210 | m | 65 | 6,6  | 2 | 12 | 4 | 860,1 | 70,3  | 18,94 | AD-SAA+ | A-T-SAA+ | WT | E3/E3 |
| 211 | f | 65 | 5,5  | 1 | 4  | 3 | 953,8 | 75,5  | 17,75 | AD-SAA+ | A+T-SAA+ | WT | E3/E4 |
| 212 | f | 65 | 7,8  | 2 | 27 | 4 | 519,9 | 61    | 23,81 | AD-SAA+ | A-T-SAA+ | WT | E3/E4 |
| 213 | m | 65 | 3,7  | 2 | 29 | 4 | 406,2 | 55,2  | 25,5  | AD-SAA+ | A-T-SAA+ | WT | E3/E3 |

|     |   |    |      |     |    |   |       |       |       |         |          |            |       |
|-----|---|----|------|-----|----|---|-------|-------|-------|---------|----------|------------|-------|
| 214 | m | 65 | 3,6  | 2   | 30 | 4 | 905,5 | 89,6  | 21,19 | AD-SAA+ | A+T-SAA- | WT         | E3/E4 |
| 215 | m | 65 | 6    | 2   | 38 | 3 | 461   | 53,8  | 25    | AD-SAA+ | A+T-SAA+ | WT         | E3/E4 |
| 216 | f | 65 | 2,3  | 2   | 34 | 0 |       |       |       | AD-SAA- | A+T-SAA- | WT         | E3/E4 |
| 217 | f | 65 | 4,4  | 2,5 | 33 | 0 |       |       |       | AD-SAA- | A+T-SAA- | WT         | E3/E4 |
| 218 | m | 65 | 3,8  | 2   | 23 | 4 | 527,9 | 60,1  | 23,6  | AD-SAA+ | A-T-SAA+ | WT         | E3/E3 |
| 219 | f | 70 | 3,5  | 2   | 12 | 3 | 691,6 | 63,65 | 20,25 | AD-SAA+ | A-T+SAA+ | c.115+1G>A | E2/E3 |
| 220 | f | 70 | 6,4  | 2   | 25 | 3 | 666,2 | 64,22 | 21,75 | AD-SAA+ | A-T-SAA+ | p.E365K    | E3/E3 |
| 221 | f | 70 | 1    | 2   | 17 | 2 | 517,2 | 67,59 | 24    | AD-SAA+ | A-T-SAA+ | p.E365K    | E2/E3 |
| 222 | m | 70 | 14,6 | 2   | 56 | 4 | 767,8 | 75,45 | 20,44 | AD-SAA+ | A+T-SAA- | p.E365K    | E3/E3 |
| 223 | m | 70 | 1,7  | 1   | 17 | 4 | 1026  | 90,85 | 18,19 | AD-SAA+ | A+T-SAA- | p.E365K    | E3/E4 |
| 224 | m | 70 | 7,6  | 2   | 31 | 2 | 426,4 | 55,25 | 25,5  | AD-SAA+ | A-T-SAA+ | p.E365K    | E3/E3 |
| 225 | m | 70 | 5,4  | 2   | 52 | 4 | 599   | 64,92 | 23,06 | AD-SAA+ | A-T+SAA+ | p.E365K    | E3/E3 |
| 226 | m | 70 | 11,5 | 2,5 | 23 | 4 | 575,3 | 59,87 | 21,94 | AD-SAA+ | A-T+SAA+ | p.E365K    | E3/E3 |
| 227 | m | 70 | 2,3  | 2   | 24 | 3 | 656,1 | 68,14 | 21,38 | AD-SAA+ | A-T-SAA+ | p.E365K    | E3/E3 |
| 228 | m | 70 | 4,3  | 2   | 42 | 3 | 672,4 | 68,28 | 22,75 | AD-SAA+ | A-T-SAA+ | p.E365K    | E3/E3 |
| 229 | m | 70 | 3,3  | 1   | 8  | 0 |       |       |       | AD-SAA- | A+T-SAA- | p.E365K    | E3/E3 |
| 230 | m | 70 | 4,8  | 1   | 6  | 0 |       |       |       | AD-SAA- | A+T-SAA- | p.E365K    | E3/E3 |
| 231 | m | 70 | 10,7 | 2   | 53 | 4 | 665,3 | 63,7  | 20,81 | AD-SAA+ | A+T-SAA- | p.G241R    | E3/E3 |
| 232 | m | 70 | 11,3 | 5   | 66 | 4 | 760,4 | 61,46 | 18,75 | AD-SAA+ | A+T-SAA- | p.L483P    | E3/E3 |
| 233 | f | 70 | 11,4 | 4   | 42 | 4 | 755,9 | 79,46 | 20,81 | AD-SAA+ | A+T-SAA- | p.L483P    | E3/E4 |
| 234 | f | 70 | 8    | 2   | 52 | 4 | 1008  | 79,7  | 18,19 | AD-SAA+ | A-T-SAA+ | p.L483P    | E2/E3 |
| 235 | f | 70 | 21,6 | 4   | 39 | 4 | 932,5 | 92,03 | 19,31 | AD-SAA+ | A-T-SAA+ | p.N409S    | E2/E3 |
| 236 | m | 70 | 6,4  | 2   | 44 | 4 | 399,9 | 48,66 | 25,75 | AD-SAA+ | A+T-SAA- | p.T408M    | E3/E4 |
| 237 | m | 70 | 0,4  | 2   | 22 | 4 | 567,8 | 51,97 | 21,94 | AD-SAA+ | A+T-SAA- | p.T408M    | E3/E3 |
| 238 | f | 70 | 14,7 | 2   | 26 | 4 | 719,5 | 65,36 | 20,44 | AD-SAA+ | A-T-SAA+ | WT         | E3/E3 |
| 239 | f | 70 | 18,8 | 2   | 33 | 4 | 465,5 | 48,68 | 24    | AD-SAA+ | A-T-SAA+ | WT         | E3/E3 |
| 240 | f | 70 | 4,3  | 2   | 30 | 4 | 980,6 | 77,6  | 17,25 | AD-SAA+ | A+T-SAA- | WT         | E3/E4 |
| 241 | f | 70 | 8,4  | 2,5 | 16 | 4 | 567,8 | 51,97 | 21,94 | AD-SAA+ | A-T+SAA+ | WT         | E3/E3 |
| 242 | f | 70 | 10,3 | 2,5 | 33 | 4 | 893,3 | 75,3  | 18,56 | AD-SAA+ | A+T-SAA- | WT         | E3/E4 |
| 243 | m | 70 | 2,9  | 2   | 16 | 3 | 1177  | 96,5  | 16,5  | AD-SAA+ | A+T-SAA+ | WT         | E2/E3 |
| 244 | m | 70 | 3,9  | 2   | 19 | 4 | 631,1 | 66,7  | 21,56 | AD-SAA+ | A-T-SAA+ | WT         | E2/E3 |
| 245 | m | 70 | 3,5  | 2   | 28 | 4 | 1254  | 97,6  | 16,31 | AD-SAA+ | A+T-SAA- | WT         | E3/E3 |

|     |   |    |      |     |    |   |       |       |       |         |          |    |       |
|-----|---|----|------|-----|----|---|-------|-------|-------|---------|----------|----|-------|
| 246 | m | 70 | 4,6  | 2   | 22 | 2 | 330,8 | 44,1  | 26,63 | AD-SAA+ | A-T-SAA+ | WT | E3/E3 |
| 247 | m | 70 | 5,2  | 2   | 38 | 4 | 869,1 | 82,1  | 19,31 | AD-SAA+ | A-T-SAA+ | WT | E3/E3 |
| 248 | f | 70 | 6,8  | 2   | 33 | 4 | 1061  | 78    | 16,69 | AD-SAA+ | A+T-SAA- | WT | E3/E4 |
| 249 | m | 70 | 4,7  | 2   | 10 | 4 | 778,1 | 76,7  | 20,06 | AD-SAA+ | A+T-SAA- | WT | E3/E3 |
| 250 | m | 70 | 9,8  | 2   | 33 | 4 | 568,9 | 79,1  | 23,81 | AD-SAA+ | A-T-SAA+ | WT | E3/E3 |
| 251 | m | 70 | 11,8 | 2   | 32 | 4 | 678,9 | 64,6  | 20,63 | AD-SAA+ | A-T-SAA+ | WT | E3/E3 |
| 252 | m | 70 | 5,5  | 2   | 22 | 4 | 625,5 | 72,7  | 23,06 | AD-SAA+ | A-T+SAA+ | WT | E3/E4 |
| 253 | m | 70 | 7,5  | 2   | 32 | 4 | 1085  | 91,2  | 17,25 | AD-SAA+ | A-T+SAA+ | WT | E3/E4 |
| 254 | m | 70 | 11,1 | 2   | 30 | 4 | 764,2 | 64,4  | 19,13 | AD-SAA+ | A-T-SAA+ | WT | E3/E3 |
| 255 | m | 70 | 7,7  | 2   | 15 | 3 | 496,1 | 56,37 | 23,75 | AD-SAA+ | A-T-SAA+ | WT | E3/E3 |
| 256 | m | 70 | 8,6  | 2   | 28 | 3 | 369,2 | 48,99 | 26,75 | AD-SAA+ | A-T-SAA+ | WT | E3/E3 |
| 257 | m | 70 | 10,6 | 2   | 21 | 4 | 581,8 | 62,33 | 22,13 | AD-SAA+ | A-T-SAA+ | WT | E3/E3 |
| 258 | m | 70 | 2,8  | 2   | 20 | 4 | 1164  | 84,5  | 15,8  | AD-SAA+ | A-T-SAA+ | WT | E3/E3 |
| 259 | m | 70 | 5,2  | 2   | 31 | 4 | 684,4 | 64,4  | 20,44 | AD-SAA+ | A-T-SAA+ | WT | E3/E3 |
| 260 | m | 70 | 2,8  | 1   | 7  | 3 | 655,7 | 66,1  | 21,5  | AD-SAA+ | A-T-SAA+ | WT | E3/E3 |
| 261 | m | 70 | 5,4  | 2   | 22 | 4 | 644,9 | 57,7  | 20,81 | AD-SAA+ | A-T-SAA+ | WT | E3/E3 |
| 262 | f | 70 | 3,6  | 2   | 21 | 3 | 656,6 | 63,6  | 21,75 | AD-SAA+ | A-T-SAA+ | WT | E3/E3 |
| 263 | f | 70 | 4,6  | 2   | 14 | 4 | 736,4 | 64,2  | 19,5  | AD-SAA+ | A-T-SAA+ | WT | E3/E3 |
| 264 | m | 70 | 6    | 2   | 25 | 3 | 681,8 | 77,5  | 22    | AD-SAA+ | A-T-SAA+ | WT | E3/E3 |
| 265 | m | 70 | 7,9  | 2   | 16 | 3 | 515,4 | 54,7  | 23,5  | AD-SAA+ | A-T-SAA+ | WT | E3/E3 |
| 266 | m | 70 | 6,5  | 2,5 | 33 | 4 | 441,5 | 50,7  | 24,38 | AD-SAA+ | A+T-SAA- | WT | E3/E3 |
| 267 | m | 70 | 5,8  | 1,5 | 22 | 4 | 900,1 | 67,3  | 17,3  | AD-SAA+ | A-T-SAA+ | WT | E3/E3 |
| 268 | m | 70 | 2,1  | 2   | 23 | 3 | 687,6 | 64,7  | 22,3  | AD-SAA+ | A-T+SAA+ | WT | E3/E3 |
| 269 | m | 70 | 2,3  | 2   | 33 | 4 | 1480  | 101   | 13,88 | AD-SAA+ | A-T-SAA+ | WT | E3/E3 |
| 270 | m | 70 | 4,9  | 2   | 31 | 4 | 885,2 | 81,1  | 19,5  | AD-SAA+ | A-T-SAA+ | WT | E2/E3 |
| 271 | m | 70 | 7,6  | 2   | 8  | 4 | 722,2 | 62,2  | 19,5  | AD-SAA+ | A-T-SAA+ | WT | E2/E3 |
| 272 | m | 70 | 6,9  | 2   | 19 | 3 | 1217  | 91,8  | 15,75 | AD-SAA+ | A-T-SAA+ | WT | E3/E3 |
| 273 | m | 70 | 6,4  | 2   | 26 | 4 | 601,9 | 60,1  | 21,75 | AD-SAA+ | A-T+SAA+ | WT | E3/E4 |
| 274 | f | 70 | 4,7  | 2   | 11 | 3 | 611,7 | 67,7  | 22,75 | AD-SAA+ | A-T+SAA+ | WT | E3/E3 |
| 275 | m | 70 | 6    | 2   | 16 | 4 | 1133  | 88    | 17,06 | AD+SAA+ | A+T+SAA+ | WT | E4/E4 |
| 276 | m | 70 | 5,8  | 2   | 27 | 4 | 1132  | 81,4  | 15,94 | AD-SAA+ | A+T-SAA- | WT | E3/E3 |

|     |   |    |      |     |    |   |       |       |       |         |          |                     |       |
|-----|---|----|------|-----|----|---|-------|-------|-------|---------|----------|---------------------|-------|
| 277 | f | 75 | 15,3 | 2   | 41 | 4 | 899,8 | 69,24 | 17,63 | AD-SAA+ | A+T-SAA- | p.D179H,<br>p.E365K | E3/E3 |
| 278 | f | 75 | 15,3 | 3   | 40 | 4 | 1012  | 90,85 | 19,88 | AD-SAA+ | A-T-SAA+ | p.E365K             | E3/E3 |
| 279 | m | 75 | 16,3 | 2,5 | 17 | 4 | 728,6 | 66,96 | 20,06 | AD-SAA+ | A-T+SAA+ | p.E365K             | E3/E3 |
| 280 | f | 75 | 5,3  | 2   | 21 | 0 |       |       |       | AD-SAA- | A+T-SAA- | p.E365K             | E2/E3 |
| 281 | m | 75 | 7    | 2   | 31 | 4 | 687,4 | 81,13 | 23,63 | AD-SAA+ | A-T+SAA+ | p.E365K             | E3/E3 |
| 282 | f | 75 | 28,4 | 2   | 25 | 4 | 714,9 | 61,54 | 19,5  | AD-SAA+ | A-T+SAA+ | p.L483P             | E3/E3 |
| 283 | f | 75 | 29,4 | 4   | 46 | 4 | 602,3 | 53,29 | 21,19 | AD-SAA+ | A-T-SAA+ | p.L483P             | E3/E3 |
| 284 | m | 75 | 17,3 | 3   | 13 | 4 | 638,7 | 64,09 | 21,94 | AD-SAA+ | A-T-SAA+ | p.N409S             | E3/E3 |
| 285 | f | 75 | 16,3 | 3   | 30 | 4 | 1089  | 70,71 | 14,81 | AD-SAA+ | A+T-SAA- | p.N409S             | E3/E4 |
| 286 | m | 75 | 3,1  | 2   | 11 | 0 |       |       |       | AD+SAA- | A+T+SAA- | p.N409S             | E3/E3 |
| 287 | m | 75 | 4,8  | 2   | 19 | 0 |       |       |       | AD+SAA- | A+T+SAA- | p.N409S             | E3/E3 |
| 288 | m | 75 | 11   | 5   | 68 | 4 | 491,1 | 59,03 | 24    | AD-SAA+ | A-T-SAA+ | p.T408M             | E2/E3 |
| 289 | m | 75 | 21,1 | 4   | 52 | 4 | 781,7 | 73,24 | 19,69 | AD-SAA+ | A-T-SAA+ | p.T408M             | E3/E3 |
| 290 | m | 75 | 7,3  | 4   | 23 | 4 | 852,2 | 77,79 | 20,25 | AD-SAA+ | A-T-SAA+ | p.T408M             | E2/E3 |
| 291 | m | 75 | 11,1 | 2   | 26 | 3 | 606,2 | 65,6  | 22,13 | AD-SAA+ | A-T-SAA+ | WT                  | E3/E3 |
| 292 | m | 75 | 1,3  | 2   | 9  | 0 |       |       |       | AD-SAA- | A-T+SAA- | WT                  | E3/E4 |
| 293 | m | 75 | 4,8  | 1   | 15 | 4 | 611,1 | 71,5  | 22,69 | AD-SAA+ | A+T-SAA- | WT                  | E3/E4 |
| 294 | m | 75 | 6,8  | 2   | 33 | 4 | 990,5 | 97,3  | 20,63 | AD-SAA+ | A+T-SAA- | WT                  | E3/E4 |
| 295 | f | 75 | 10   | 2   | 18 | 4 | 1092  | 80,5  | 16,5  | AD-SAA+ | A+T-SAA- | WT                  | E3/E4 |
| 296 | m | 75 | 2,1  | 2   | 20 | 4 | 745,1 | 65,6  | 22,63 | AD-SAA+ | A+T-SAA- | WT                  | E2/E3 |
| 297 | m | 75 | 9,9  | 3   | 35 | 4 | 1101  | 91,2  | 17,44 | AD+SAA+ | A+T+SAA+ | WT                  | E3/E4 |
| 298 | m | 75 | 11,4 | 4   | 32 | 4 | 695,7 | 56,5  | 19,5  | AD+SAA+ | A+T+SAA+ | WT                  | E3/E4 |
| 299 | m | 75 | 12,6 | 4   | 61 | 4 | 1030  | 66,8  | 15,19 | AD+SAA+ | A+T+SAA+ | WT                  | E3/E4 |
| 300 | m | 75 | 13   | 2   | 47 | 4 | 792,1 | 62,2  | 18,56 | AD-SAA+ | A+T-SAA- | WT                  | E3/E3 |
| 301 | m | 75 | 7,4  | 2   | 24 | 4 | 395,5 | 50,9  | 25,69 | AD-SAA+ | A+T-SAA- | WT                  | E3/E3 |
| 302 | f | 75 | 5,6  | 2   | 22 | 4 | 805,1 | 77,7  | 19,88 | AD-SAA+ | A-T+SAA+ | WT                  | E2/E4 |
| 303 | f | 75 | 4,3  | 1   | 9  | 4 | 463,6 | 54,9  | 23,81 | AD+SAA+ | A+T+SAA+ | WT                  | E3/E3 |
| 304 | f | 75 | 6,1  | 2   | 27 | 4 | 544,4 | 59    | 23,06 | AD+SAA+ | A+T+SAA+ | WT                  | E3/E3 |
| 305 | m | 75 | 3,5  | 2   | 31 | 4 | 673,2 | 70,9  | 21    | AD-SAA+ | A-T-SAA+ | WT                  | E3/E3 |
| 306 | m | 75 | 6    | 2   | 20 | 4 | 1012  | 87,5  | 18    | AD-SAA+ | A-T-SAA+ | WT                  | E3/E3 |
| 307 | f | 75 | 4,7  | 2   | 17 | 3 | 617,9 | 63,9  | 21,75 | AD+SAA+ | A+T+SAA+ | WT                  | E3/E4 |

|     |   |    |     |     |    |   |       |      |       |         |          |    |       |
|-----|---|----|-----|-----|----|---|-------|------|-------|---------|----------|----|-------|
| 308 | f | 75 | 6,7 | 2   | 20 | 4 | 837,4 | 62,7 | 18,56 | AD-SAA+ | A-T+SAA+ | WT | E3/E4 |
| 309 | m | 75 | 9,7 | 2,5 | 68 | 2 | 285,5 | 33   | 29,63 | AD-SAA+ | A-T-SAA+ | WT | E3/E3 |
| 310 | f | 75 | 3   | 2   | 10 | 3 | 479,5 | 54,5 | 24    | AD-SAA+ | A-T-SAA+ | WT | E3/E3 |
| 311 | f | 75 | 4   | 1   | 10 | 4 | 662,8 | 64,9 | 21    | AD-SAA+ | A-T-SAA+ | WT | E3/E3 |
| 312 | f | 75 | 6   | 2   | 14 | 4 | 834,3 | 84,5 | 21,75 | AD-SAA+ | A-T-SAA+ | WT | E3/E3 |
| 313 | f | 75 | 6,9 | 2   | 15 | 4 | 817,1 | 68,6 | 18,94 | AD-SAA+ | A-T-SAA+ | WT | E3/E3 |
| 314 | m | 75 | 7,2 | 2   | 39 | 4 | 847,7 | 74,1 | 18,94 | AD-SAA+ | A-T-SAA+ | WT | E3/E3 |
| 315 | m | 75 | 4,7 | 2   | 19 | 4 | 666,7 | 62   | 20,81 | AD-SAA+ | A+T-SAA- | WT | E3/E3 |
| 316 | f | 75 | 2,9 | 2   | 13 | 0 |       |      |       | AD+SAA- | A+T+SAA- | WT | E3/E4 |
| 317 | m | 80 | 4,5 | 2   | 22 | 4 | 1013  | 83,5 | 17,81 | AD-SAA+ | A+T-SAA- | WT | E2/E3 |
| 318 | f | 80 | 8,7 | 2   | 24 | 4 | 915   | 68,5 | 17,25 | AD+SAA+ | A+T+SAA+ | WT | E3/E4 |
| 319 | m | 80 | 7,1 | 2   | 21 | 4 | 880,2 | 75,6 | 18,56 | AD-SAA+ | A-T-SAA+ | WT | E3/E3 |
| 320 | f | 80 | 5,1 | 2   | 7  | 0 |       |      |       | AD+SAA- | A+T+SAA- | WT | E3/E4 |

f=female, m=male, WT=wildtype

## Supplemental Figure 1: Distribution of CSF Amyloid-beta, phospho181-tau and $\alpha$ -Syn in PD<sub>wildtype</sub> and PD<sub>GBA1</sub>

PD<sub>GBA1</sub>

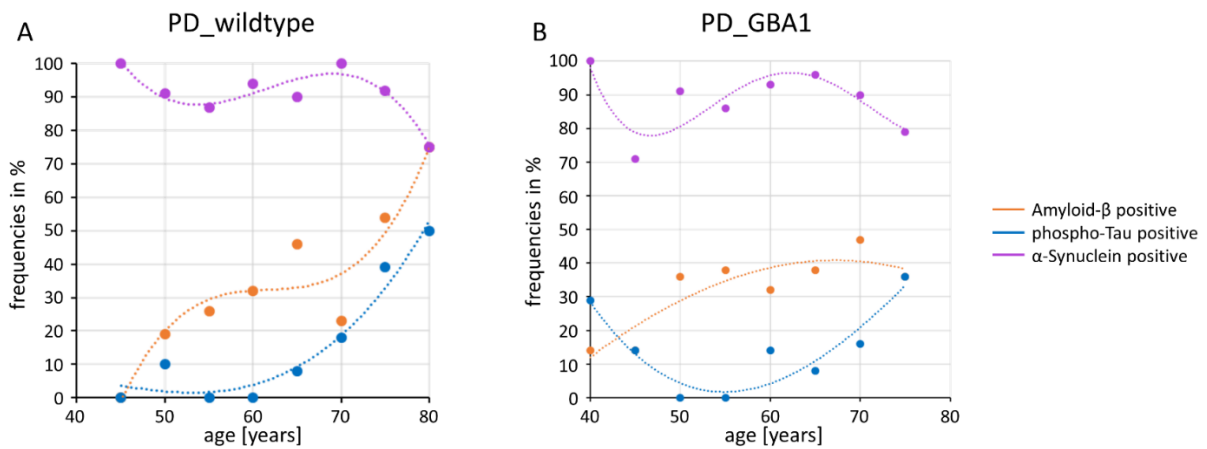

Panel A + B show the age-related distribution of CSF Amyloid- $\beta$ , phospho181-Tau and  $\alpha$ -Synuclein profiles in PD<sub>wildtype</sub> and PD<sub>GBA1</sub>. A) For PD<sub>wildtype</sub> presence of Amyloid- $\beta$  and phospho181-Tau profiles are correlated with increased age while CSF  $\alpha$ -Synuclein profile remained stable. B) For PD<sub>GBA1</sub> the distribution of the CSF profiles did not differ between age groups.

## Supplemental Figure 2: $\alpha$ -syn RT-QuIC fluorescence emission curves in the study cohort.

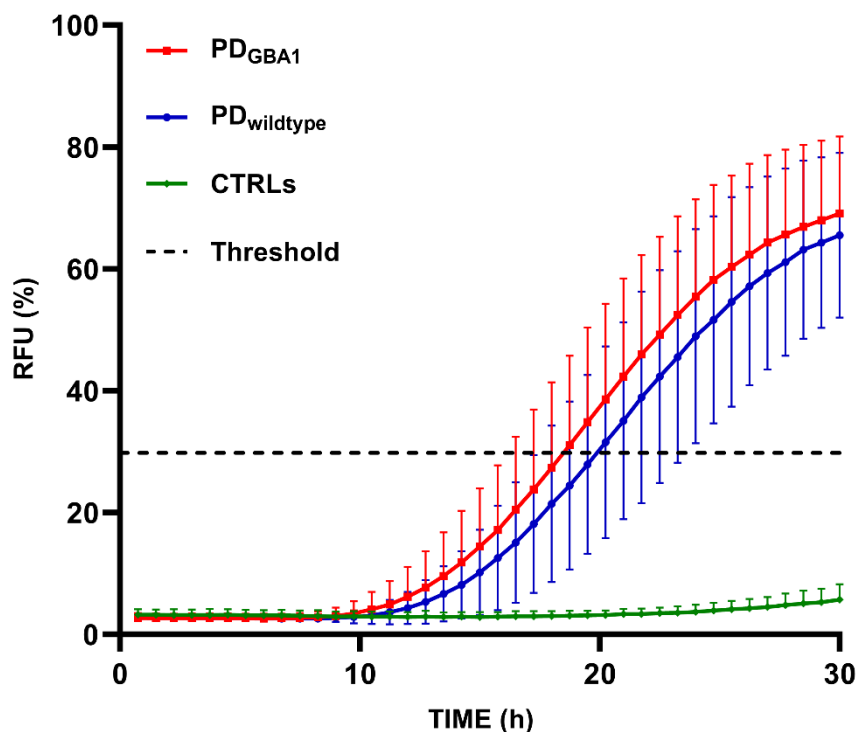

Mean normalized fluorescence emission curves of all tested cases. The PD<sub>GBA1</sub>, PD<sub>wildtype</sub> and Controls (CTRLs) groups are shown separately. The black dashed line represents the threshold. The error bars indicate the standard deviation.
